# Supplementary material
Source: PubMed Central journal article supplement (PMC9681021)

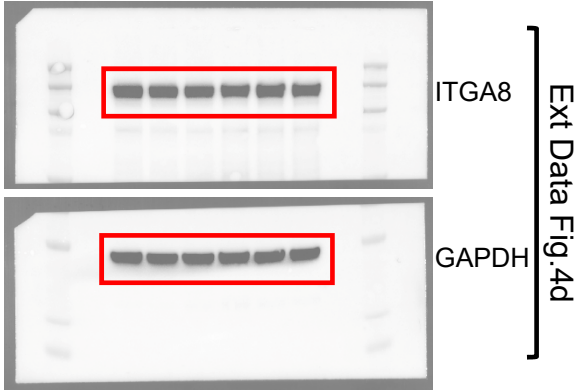

Supplement: NIHMS1846392-supplement-1846392_SD_ED_Fig_4_uncropped_WB.pdf [file NIHMS1846392-supplement-1846392_SD_ED_Fig_4_uncropped_WB.pdf]

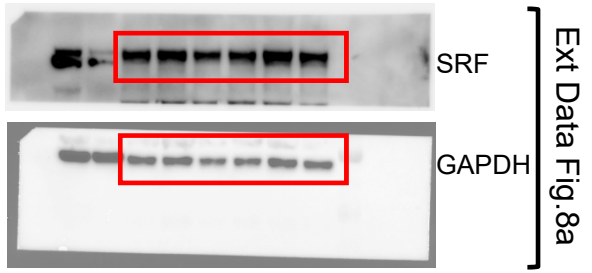

Supplement: NIHMS1846392-supplement-1846392_SD_ED_Fig_8_uncropped_WB.pdf [file NIHMS1846392-supplement-1846392_SD_ED_Fig_8_uncropped_WB.pdf]
